# Supplementary material
Source: Research Square preprint supplement (doi:10.21203/rs.3.rs-9698297/v1)

**Characterization of Selected Lactic Acid Bacteria from *Tapay*: A Starter for Maguindanao Ethnic Delicacy in Cotabato City, Philippines**

Mark Winston C. Ladrillo1, Lynette C. Cimafranca1,

Inish Chris P Mesias1, and Lijueraj J. Cuadra2

1Department of Food Science and Technology, Faculty of Agriculture and Food Science, Visayas State University, Baybay City, Leyte, Philippines.

2Department of Agriculture Education and Extension, Faculty of Agriculture and Food Science, Visayas State University, Baybay City, Leyte, Philippines.

Corresponding Author: Mark Winston C. Ladrillo

Corresponding Author Email:markladwins@gmail.com

**Images (Supplementary Files)**


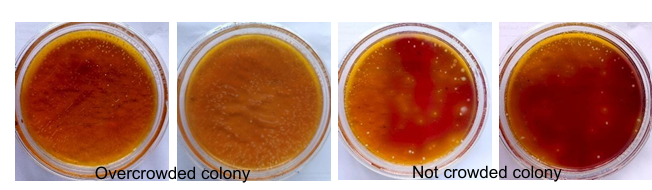


Figure 1: Mother culture of isolated LAB


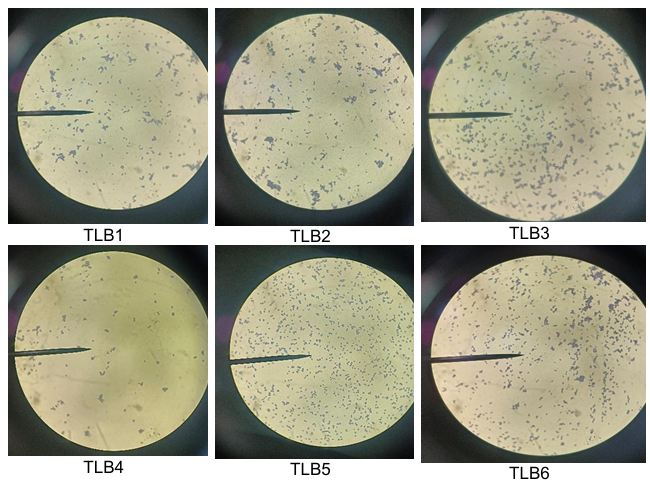


Figure 2: Gram-staining of isolated LAB


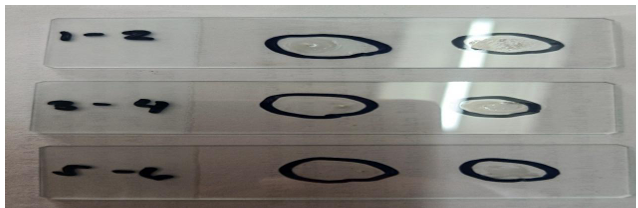


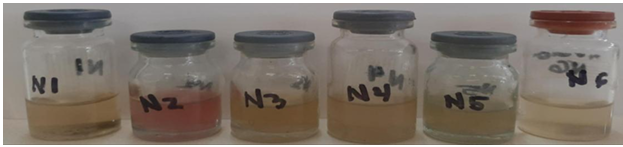
Figure 3: Catalase test result of isolated LAB

Figure 4: Nitrate reduction result of isolated LAB


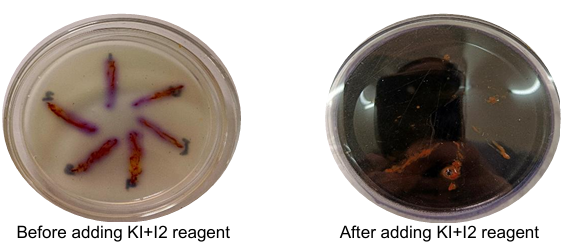


Figure 5: Starch hydrolysis results of isolated LAB


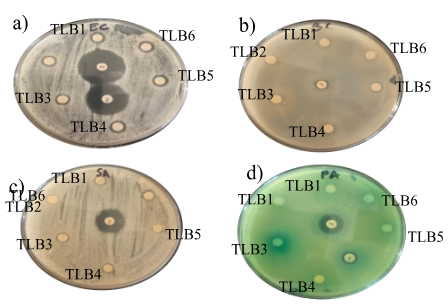


Figure 6. Potential antibacterial activity of isolated LAB a) Petri image of *E. coli* Biotech 1634 b) Petri image of *B. cereus* Biotech 1509 c) Petri image of *S. aureus* ATCC 25923 d) Petri image of *P. aeruginosa* Biotech 1335


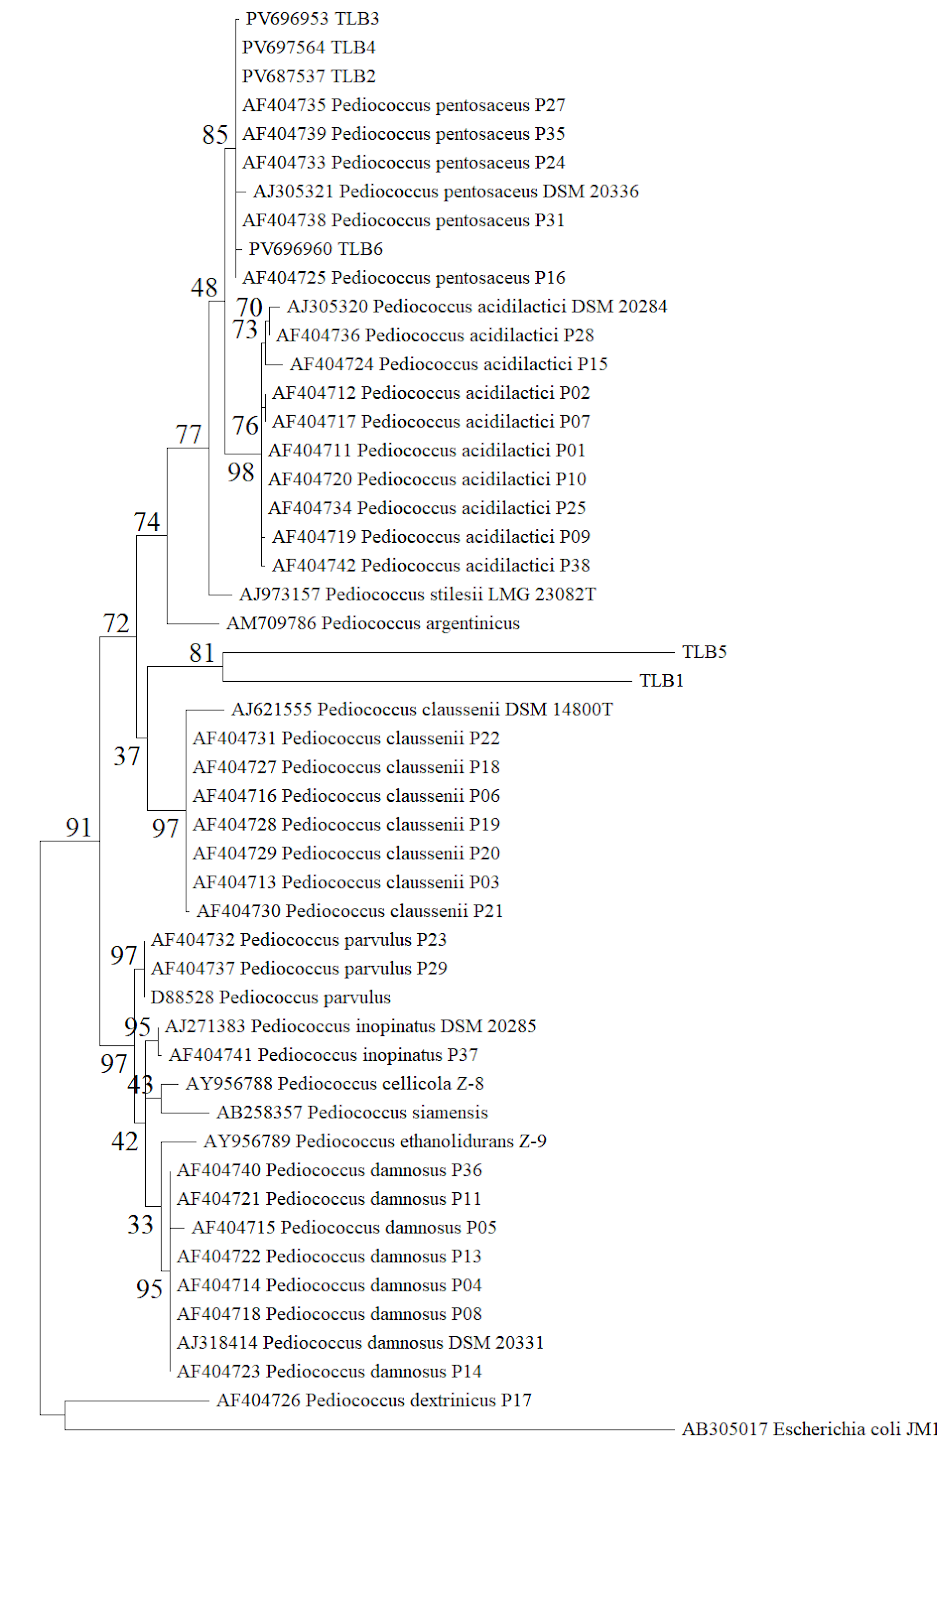


Figure 7. Maximum-likelihood phylogenetic tree based on 16S rRNA gene sequences of test strains and related type species. Escherichia coli JM109 was used as an out-group. Bootstrap values based on 1000 replications are listed as percentages at branching points. The accession numbers are given with the species. The scale bar represented 0.5% divergence

Table 1 . Antimicrobial activity of isolated LAB against pathogenic bacteria


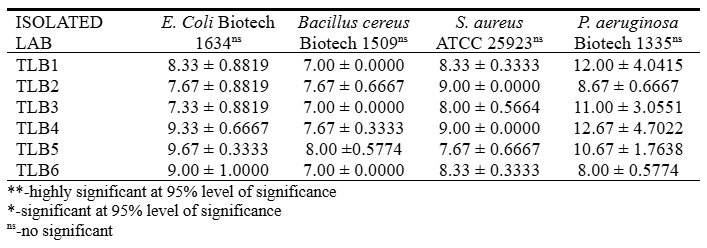

Supplement: Supplementary file 1 [file ca52f7abb41e45eea7aeef55.docx]
